# Supplementary material for: Third Generation Cephalosporin Resistant Enterobacterales Infections in Hospitalized Horses and Donkeys: A Case–Case–Control Analysis
Source: PubMed Central journal article supplement (PMC7913880; doi:10.3390/antibiotics10020155), 2021-02-04
Supplement: antibiotics-10-00155-s001.pdf [file antibiotics-10-00155-s001.pdf]

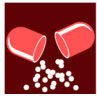

Table S1. Descriptive statistics for the entire study population (n = 1620 horses and donkeys).

| Parameter                                       | Classification                                                                                       | Valid Percentage %<br>(No. of Cases) |
|-------------------------------------------------|------------------------------------------------------------------------------------------------------|--------------------------------------|
| Sex                                             | Female                                                                                               | 58 (n = 935/1612)                    |
|                                                 | Male                                                                                                 | 42 (n = 677/1612)                    |
| Horse Breed                                     | Arabian                                                                                              | 43.8 (n = 412/940)                   |
|                                                 | Local breeds                                                                                         | 30 (n = 281/940)                     |
|                                                 | Gaited horses<br>(Missouri fox trotter, Rocky mountain horse, Single foot, Tennessee walking horse,) | 8.2 (n = 77/940)                     |
|                                                 | American Quarter horse                                                                               | 6 (57/940)                           |
|                                                 | Warmblood                                                                                            | 3.9 (n = 37/940)                     |
|                                                 | Friesian                                                                                             | 2.4 (n = 23/940)                     |
|                                                 | Thoroughbred                                                                                         | 1.6 (n = 15/940)                     |
|                                                 | Others                                                                                               | 4.1 (n = 38/940)                     |
| Median Age on Hospital Admission, Years (range) |                                                                                                      | 5 (0–27)                             |
| Age Groups                                      | Neonates (0–30 days)                                                                                 | 14.8 (n = 239/1620)                  |
|                                                 | Weanling (30 days- 1 year)                                                                           | 11.6 (n = 188/1620)                  |
|                                                 | 1–3 years                                                                                            | 17.1 (n = 277/1620)                  |
|                                                 | Adult (3–20 years)                                                                                   | 55 (n = 891/1620)                    |
|                                                 | Geriatric (>20 years)                                                                                | 1.5 (25/1620)                        |
| Median Hospital Length of Stay, Days (range)    |                                                                                                      | 3 (0–190)                            |
